# Supplementary material for: Wearable ECG and PPG for Anxiety Detection: A Translational Digital Medicine Perspective
Source: Research Square preprint supplement (doi:10.21203/rs.3.rs-8445330/v1), 2026-01-14
Supplement: Supplementary file 1 [file 5cdf22752a9de9121433e4dd.pdf]

## Supplementary Information

### S1. Inclusion and Exclusion Criteria

**Table S1** presents the detailed inclusion and exclusion criteria used to screen and select studies for this systematic review.

| <b>Criterion Category</b> | <b>Inclusion Criteria</b>                                                                                             | <b>Exclusion Criteria</b>                                                                                |
|---------------------------|-----------------------------------------------------------------------------------------------------------------------|----------------------------------------------------------------------------------------------------------|
| <b>Study Type</b>         | Original research articles with full-text access                                                                      | Reviews, meta-analyses, editorials, letters, conference abstracts, symposium papers                      |
| <b>Publication Date</b>   | Published between January 1, 2015, and July 31, 2025                                                                  | Published before 2015 or After July 2025                                                                 |
| <b>Language</b>           | English                                                                                                               | Non-English publications                                                                                 |
| <b>Population</b>         | Human participants (any age group)                                                                                    | Animal studies or in vitro studies                                                                       |
| <b>Sensor Modality</b>    | Studies using ECG or PPG sensors (wearable, portable, or clinical) for anxiety detection, recognition, or prediction  | Studies not involving ECG or PPG sensors; studies using other sensors only (e.g., GSR, EEG, respiration) |
| <b>Outcome Focus</b>      | Studies reporting physiological signal analysis related to anxiety or stress with identifiable measurement parameters | Studies not addressing anxiety or stress as a primary or secondary outcome                               |
| <b>Data Accessibility</b> | Full-text available via institutional or open-access sources                                                          | No access to full text (paywall without institutional access, unavailable through interlibrary request)  |
| <b>Study Quality</b>      | Clear methodology, analysable results, and documented measurement protocols                                           | Insufficient methodological detail or unclear data collection/analysis procedures                        |

## S2. Methodological Limitations Rating Criteria

**Table S2** presents the definitions and rating criteria for the six methodological limitations (L1-L6) used to assess the quality of included studies. Each limitation was rated as Low, Moderate, or Serious based on the criteria described below.

| Code      | Limitation                            | Low                                                                           | Moderate                                                                            | Serious                                                                                           |
|-----------|---------------------------------------|-------------------------------------------------------------------------------|-------------------------------------------------------------------------------------|---------------------------------------------------------------------------------------------------|
| <b>L1</b> | Restricted Participant Selection      | Diverse sample or justified narrow group; some subgroup reporting             | Over-representation of one group (60-80%) or narrow age band; partial justification | Very narrow group without justification; excludes key populations; no generalizability discussion |
| <b>L2</b> | Repetitive Exposure Effects           | Randomized order; adequate washout; $\leq 2$ repetitions                      | 3-5 repetitions; incomplete counterbalancing; short washout                         | $> 5$ repetitions or fixed order; no washout; high practice/fatigue/habitu ation risk             |
| <b>L3</b> | Sensory Modality Restriction          | Modality matches aims or multimodal used; claims limited to tested modality   | Single modality but broader conclusions implied; partial rationale                  | Modality misaligned with conclusions; no rationale                                                |
| <b>L4</b> | Mismatched Stimulus Duration          | Duration aligns with physiological response; small deviations ( $\leq 20\%$ ) | Noticeable mismatch (0.5-0.8x or 1.2-1.5x planned); incomplete timing logs          | Major mismatch ( $< 0.5x$ or $> 1.5x$ planned); poor logging; invalidates features                |
| <b>L5</b> | Detection Modality Constraints        | Appropriate sensors; adequate sampling rate; QC present                       | Borderline adequacy; marginal sampling; occasional artifacts; limited calibration   | Sensor/modality not fit for purpose; inadequate sampling; poor placement; high artifacts          |
| <b>L6</b> | Inadequate Signal Collection Duration | Long enough for stable features, baseline & multiple trials included          | Minimal but usable; few trials; short baseline                                      | Too short for planned features; no baseline; single brief trial                                   |

### S3. Summary of Included Studies

**Table S3.** Summary of included studies examining anxiety detection using wearable electrocardiography (ECG) and photoplethysmography (PPG). This table provides a comprehensive overview of the 38 studies included in this systematic review, detailing author information and publication year, number of participants, age range, health status, self-assessment instruments used (including the State-Trait Anxiety Inventory (STAI) and Trier Social Stress Test (TSST)), anxiety induction method, physiological detection modalities (such as electrodermal activity (EDA), electromyography (EMG), galvanic skin response (GSR), heart rate variability (HRV), respiration (RSP), remote photoplethysmography (rPPG), and accelerometer sensor (ACC)), signal acquisition sites, recording duration, features analyzed, analytical methods employed, and key findings. N/R: not reported; N/A: not applicable.

| Authors (Year)       | No. of Participants                         | Age                | Health Status                | Self-assessment Tests         | Induction Method                                                  | Detection Method     | Acquisition Site                  | Signal Length      | Features Analyzed                                          | Analysis Method                                           | Results                                                                          |
|----------------------|---------------------------------------------|--------------------|------------------------------|-------------------------------|-------------------------------------------------------------------|----------------------|-----------------------------------|--------------------|------------------------------------------------------------|-----------------------------------------------------------|----------------------------------------------------------------------------------|
| Yang et al. (2025)   | 18 participants (4 female, 14 male)         | 67.33 ± 6.71 years | Parkinson's disease patients | N/A                           | FOG induced via TUG test under ON/OFF medication states           | ECG, GSR, IMU        | IMU: feet; GSR: hands; ECG: torso | 126.63 minutes     | Time, frequency, nonlinear features from ECG, HR, GSR, IMU | XGBoost, SVM, KNN, Decision Trees; Bi-LSTM, TCN, ASFormer | Physiological signals did not enhance FOG detection; IMU features most effective |
| Gupta et al. (2024)  | 202 healthcare providers (100 RYM, 102 SMC) | ≥ 18 years old     | Healthy                      | DASS-21, Mini Z Questionnaire | RYM: 1-week Rajyoga + daily 30-min virtual; SMC: 1-day counseling | 12-lead ECG at 500Hz | ECG machine connected to chest    | 10 seconds per ECG | Ultra Short HRV; Time Series features (tsfresh)            | Random Forest with SMOTE                                  | Rajyoga reduced anxiety, depression, burnout; ML predicted burnout from ECG      |
| Baygin et al. (2024) | 19 subjects (5 female)                      | N/R                | Anxiety disorders            | Hamilton Anxiety              | Anxiety-inducing                                                  | ECG                  | Wearable sensors (site            | 4-6 seconds        | PBP-based feature                                          | KNN, SVM, Chi2                                            | Classification accuracy over                                                     |

|                          |                            |                                             |            |                                                      |                                                         |                        |                                            |                   |                                                                       |                                                |                                                                                 |
|--------------------------|----------------------------|---------------------------------------------|------------|------------------------------------------------------|---------------------------------------------------------|------------------------|--------------------------------------------|-------------------|-----------------------------------------------------------------------|------------------------------------------------|---------------------------------------------------------------------------------|
|                          |                            |                                             |            | Rating Scale                                         | videos                                                  |                        | not reported)                              |                   | extraction, wavelet transform                                         | functions                                      | 98.5% for anxiety classification                                                |
| Kiel et al. (2024)       | 119 children               | 4 years at baseline, 5-7 years at follow-up | Healthy    | Mother-reported social anxiety and effortful control | Baseline and speech task for RSA measurement            | ECG, Respiration       | Laboratory setting, 3-Lead formation, Belt | 1 hour 30 minutes | Baseline and reactive RSA, effortful control, social anxiety symptoms | Statistical analysis of RSA modulation         | Effortful control buffers against social anxiety in those with low baseline RSA |
| Martin et al. (2024)     | 100 nursing professionals  | N/R                                         | Healthy    | Various distress and moral distress questionnaires   | VR scenarios involving morally complex decisions        | ECG, EDA, pleth, RSP   | VR session and wearable device monitoring  | 1 hour 5 minutes  | Stress and moral distress response, digital phenotype profiling       | Pre-post comparison, ML for digital phenotype  | VR expected to elicit stress; digital phenotypes could predict distress         |
| Campanella et al. (2024) | 29 Participants (8 female) | 20-60 years old                             | N/R        | N/R                                                  | Cognitive, mental, and psychological stressors protocol | PPG, EDA (Empatica E4) | Wrist                                      | 35 minutes        | N/R                                                                   | Signal processing pipeline                     | Dataset provides insights into work/academic stress                             |
| Prajod et al. (2024)     | 37 participants (8 female) | 18–48 years                                 | N/R        | NASA-TLX questionnaire                               | Simulated industrial human-robot collaboration task     | ECG (Polar H10)        | Chest band                                 | 1 hour            | HRV temporal features, Mean heart rate, Arousal levels                | Comparison of HRV between challenge conditions | Significant arousal and HR differences between boredom and higher challenges    |
| Dal Bò et                | 66                         | N/R                                         | Depressive | Depressive                                           | Emotional                                               | ECG,                   | Chest in                                   | 1 hour            | HRV (vagal                                                            | Repeated                                       | HRV increased                                                                   |

|                            |                              |                                 |                                            |                                                         |                                                   |               |                                                |            |                                                                   |                                                              |                                                                              |
|----------------------------|------------------------------|---------------------------------|--------------------------------------------|---------------------------------------------------------|---------------------------------------------------|---------------|------------------------------------------------|------------|-------------------------------------------------------------------|--------------------------------------------------------------|------------------------------------------------------------------------------|
| al. (2024)                 | participants                 |                                 | symptoms, social anxiety, healthy controls | and social anxiety symptoms assessed                    | body odors to modulate responses to neutral faces | HRV, EEG      | modified lead II configuration                 | 30 minutes | tone), ERPs, ERPSs (delta and beta power)                         | measures ANOVA                                               | with emotional odors; ERPs showed higher delta and lower beta                |
| Alshanskai a et al. (2024) | 90 participants              | 18 to 45 years                  | Healthy to depression/anxiety disorders    | BDI-II, STAI, STAI-T                                    | Cognitive 1-back task with six challenging levels | ECG, PPG      | ECG: chest, PPG: fingertip/wrist               | 15 minutes | HRV, task accuracy, ECG and PPG heart rate changes                | Correlation of physiological markers with psychological data | Higher task difficulty raised HR; anxiety linked to cardiovascular responses |
| Mansour et al. (2023)      | 36 participants              | 18-40 years old                 | Healthy                                    | STAI-S, Visual Analog Scale                             | Trier social stress test (TSST)                   | PPG, VOCs     | PPG: wrist; VOCs: underarm and breath          | 2 hours    | HRV, cortisol levels, anxiety, breath and skin VOC fingerprinting | GC-MS sensor array, prediction model                         | Breath VOCs differed by stress; eight VOCs linked to stress                  |
| Lewis et al. (2023)        | 125 Participants (96 female) | 18-55 years                     | PTSD symptoms                              | PTSD hyperarousal score, Dissociative Experiences Scale | Dark-enhanced startle paradigm, Fear conditioning | EMG, ECG, EDA | EMG: muscle groups, ECG: chest, EDA: fingers   | 1 minute   | Fear-potentiated startle, EMG, ECG, skin conductance              | Penalized regression, OLS, cross-validation                  | Penalized regressions improved fear extinction prediction                    |
| van Dijk et al. (2023)     | 57 participants              | Mean age 26.70 (SD= 9.86) years | Healthy                                    | Questionnaires (stress and anxiety)                     | Diaphragmatic breathing exercise (five times)     | PPG, ECG      | PPG: mobile phone camera, ECG: NeXus apparatus | 25 minutes | RMSSD, pNN50, LF power, HF power, resonance frequency             | N/R                                                          | High correlation between PPG and ECG-derived HRV indices                     |
| Vabba et al. (2023)        | 245 (total), 28 (HRV)        | N/R                             | General population                         | MAIA-2, PHQ-9,                                          | Self-reported                                     | PPG           | Remote (via phone app)                         | N/R        | Interoceptive accuracy,                                           | Longitudinal statistical                                     | Lower HRV, higher                                                            |

|                       |                                        |                    |                                            |                             |                                                       |                                |                                          |                  |                                                          |                                                |                                                                          |
|-----------------------|----------------------------------------|--------------------|--------------------------------------------|-----------------------------|-------------------------------------------------------|--------------------------------|------------------------------------------|------------------|----------------------------------------------------------|------------------------------------------------|--------------------------------------------------------------------------|
|                       | subsample)                             |                    |                                            | STAI, PSQI                  | questionnaires, heartbeat counting task               |                                |                                          |                  | HRV, MAIA-2 scores                                       | analysis                                       | depression, anxiety during lockdown                                      |
| Dahal et al. (2023)   | 40 subjects                            | N/R                | Healthy                                    | N/R                         | TSST (WESAD), interruptions and time pressure (SWELL) | ACC, ECG, TEMP, RESP, EDA, EMG | Chest-worn sensors                       | 45 minutes       | SDNN, RMSSD, LF power, HF power, LF/HF ratio             | mRMR, Random Forest Algorithm                  | Global stress RF model achieved over 99% accuracy                        |
| Rinella et al. (2022) | 31 healthy adults (14 male, 17 female) | 18–39 years old    | Healthy                                    | SAM, POMS, STAI-Y           | Music videos                                          | ECG, PPG                       | PPG: left wrist, I-Lead ECG              | 7 minutes        | R-wave detection, IBIs for both signals                  | Analyzed baseline differences                  | PPG achieved accuracy comparable to ECG in detecting affective variables |
| Ritsert et al. (2022) | 19 participants (14 males, 5 females)  | 18–56 years old    | Healthy students                           | STAI-Y, POMS                | Anxiety-inducing and non-anxiety-inducing video clips | ECG, RSP                       | ECG and RSP: portable device (BIOPAC)    | 41 minutes       | HRV, BRV, MHR, SD, RMSSD, SDNN, MBR                      | Longitudinal mixed-effects                     | Significant changes in HRV and BRV between anxiety states                |
| Ding et al. (2022)    | 30 participants                        | 24.37 ± 2.16 years | No mental disorders history                | Dimensional emotion ratings | Aversive pictures or risk of electric shocks          | ECG, GSR                       | ECG: inside of both wrists, GSR: fingers | 1 hour 5 minutes | R-R intervals, RMSSD, TRI, TINN, SD1, SD2, LF, HF, LF/HF | SVR, LASSO regression, ensemble of trees, LOSO | High correlation between predicted and self-reported state anxiety       |
| Howell et al. (2022)  | 73 participants                        | 18-36 years old    | Varying levels of affectivity, depression, | BDI-II, BAI, PANAS          | Virtual Morris Water Task                             | ECG                            | ECG on the chest                         | N/A              | HRV, SDNN, Log-transformed SDNN                          | Statistical analysis of HRV and affective      | Higher baseline HRV improved set-shifting; low NA enhanced               |



|                             |                                   |                      |                                 |                                                     |                                                    |                                                |                                                       |            |                                                                |                                                                |                                                                    |
|-----------------------------|-----------------------------------|----------------------|---------------------------------|-----------------------------------------------------|----------------------------------------------------|------------------------------------------------|-------------------------------------------------------|------------|----------------------------------------------------------------|----------------------------------------------------------------|--------------------------------------------------------------------|
| Szakonyi et al. (2021)      | 7 participants (3 Female)         | 63.14 years          | Healthy                         | STAI                                                | TSST, Stroop Color Word Test                       | ECG                                            | Right side under collarbone, left side on rib cage    | 2-3 days   | HRV time-domain, frequency-domain, non-linear features         | FFT, AR modeling, CHAID, C5, Logistic Regression, SVM, XGBoost | 96.31% accuracy with 5-min overlap; 99.47% F1 participant-wise     |
| Costa et al. (2021)         | 106 Participants                  | ≥ 18 years old       | Diagnosed with GAD              | GAD-7, M.I.N.I., HAM-D, PSWQ                        | Cognitive tasks with neutral and emotional stimuli | PPG                                            | Second and third fingers of left hand                 | 16 hours   | HRV, High-Frequency HRV, RMSSD, IBI, HRV percent variation     | Regression analyses, F-statistics, MICE, LOCF                  | HRV flexibility predicted EI improvement in FLX group              |
| Schwerdtfeger et al. (2021) | 21 participants (9 men, 12 women) | Mean age 22.48 years | Healthy                         | Six-point Likert scale (closeness, valence, warmth) | Social interactions and daily life stressors       | ECG, accelerometer                             | Chest (ECG) and body (movement sensor)                | 36 hours   | RMSSD, Prevalence of AddHRVr triggers, Quality of interactions | Algorithm simulation and multilevel models                     | HRV decrease associated with lower quality social interactions     |
| Veluswamy et al. (2020)     | 33                                | ≥ 13 years old       | Sickle Cell Disease vs. Control | STAI Form Y-1 and Y-2, PASS                         | Thermal stimulation (cold and heat) via thermode   | PPG, ECG, continuous BP, respiratory waveforms | Left thumb (PPG), chest (ECG), finger, thorax/abdomen | 45 minutes | MBF changes, vasoconstriction, HRV, LFP, HFP, LHR              | Cross-correlation, t-test, Wilcoxon, repeated-measures ANOVA   | SCD patients showed greater vasoconstriction, faster response      |
| Ihmig et al. (2020)         | 57 individuals                    | Ages 18-40           | Spider-fearful individuals      | Subjective Ratings of Arousal                       | Spider Video Clips                                 | ECG, EDA, RSP                                  | ECG: lead II, EDA: palm, RSP: chest strap             | 21 minutes | HR, NNI, avNN, sdNN, rMSSD, NN50, pNN50, pNN20; EDA features   | Decision Trees, Discriminant Analysis, KNN, SVM, Naïve Bayes   | 89.8% accuracy for two-level, 74.4% for three-level classification |
| Reichenberger               | 70                                | N/R                  | 35 SAD                          | SIAS,                                               | Social-                                            | Facial                                         | ECG: upper                                            | N/R        | Heart rate,                                                    | Repeated                                                       | FPE measures                                                       |



|                        |                                              |                     |                               |                                                                    |                                                          |                             |                                                        |             |                                                              |                                                           |                                                                            |
|------------------------|----------------------------------------------|---------------------|-------------------------------|--------------------------------------------------------------------|----------------------------------------------------------|-----------------------------|--------------------------------------------------------|-------------|--------------------------------------------------------------|-----------------------------------------------------------|----------------------------------------------------------------------------|
| ger et al. (2019)      | participants                                 |                     | patients, 35 healthy controls | SASKO, BDI-II, BFNE-R, FPES                                        | evaluative video clips                                   | EMG, ECG                    | sternum and lowest rib; EMG: brow and cheek            |             | corrugator EMG, zygomaticus EMG, valence, arousal            | measures ANOVA, t-tests, stepwise logistic regression     | and positive video reactivity better predicted SAD                         |
| Scott et al. (2019)    | 51 patients, 13 nurses                       | Over 60 years old   | Peripheral arterial disease   | N/R                                                                | Observing and interviewing participants                  | ABPI and MPPG               | ABPI: brachial artery and ankles; MPPG: multiple sites | N/R         | Test discomfort, device preference                           | Thematic analysis                                         | MPPG preferred for ease, speed, comfort; ABPI caused discomfort            |
| Roy et al. (2019)      | 25                                           | N/R                 | N/R                           | Emotional intensity ratings, task performance, self-report anxiety | High-arousal negative images; shoot-don't-shoot scenario | EEG, ECG                    | Scalp for EEG; unspecified for ECG                     | 25 minutes  | Brain connectivity, HRV, emotional intensity, anxiety        | Functional connectivity analysis, correlation analyses    | Lab intensity correlated with simulation anxiety; theta-band predicted HRV |
| Parent et al. (2019)   | 18 participants (4 females)                  | 20-35 years         | Healthy                       | STAI                                                               | Modified n-back task with aversive auditory stressors    | ECG, fNIRS                  | fNIRS: 16-channel headband; ECG: Single lead           | 45 minutes  | fNIRS: HbO2 and HHb; ECG: Time and frequency domain features | Naive Bayes classifier                                    | fNIRS + ECG combination provided best accuracy for mental workload         |
| Matthews et al. (2019) | 68 undergraduate students (31 women, 37 men) | Mean age 19.3 years | Healthy                       | AnTI, Hardiness Scale, Short Grit Scale, DSSQ, NASA-TLX            | Multi-UAS control simulation; negative feedback          | EEG, ECG, fNIR, TCD sensors | EEG: frontal scalp; fNIR: forehead; TCD: temporal      | 1 hour      | EEG spectral power, IBI, HRV, rSO2, CBFV                     | Repeated measures ANOVA, correlation, regression analysis | Both stressors increased distress and high-frequency EEG activity          |
| Panitz et al. (2018)   | 87 right-handed                              | 18–35               | Healthy                       | MPQ, NEO-FFI, BIS,                                                 | CS: Neutral                                              | EEG, ECG, GSR               | EEG: 64-channel                                        | 4-6 seconds | EEG: LPP; ECG: Fear                                          | ICA artifact removal, R-                                  | COMT Val158Met                                                             |

|                           |                                  |                      |                               |                 |                                                                  |                                  |                                                                               |            |                                                                      |                                                                  |                                                                       |
|---------------------------|----------------------------------|----------------------|-------------------------------|-----------------|------------------------------------------------------------------|----------------------------------|-------------------------------------------------------------------------------|------------|----------------------------------------------------------------------|------------------------------------------------------------------|-----------------------------------------------------------------------|
|                           | males                            | years                |                               | ZKPQ, STAI, BAS | male faces; US: 1s white noise burst (95 dB)                     |                                  | scalp; ECG: left leg, right forearm; SCR: left hand                           | interval s | bradycardia; SCR: Log-transformed                                    | peak detection; ANOVAs, regression, ANCOVA                       | affected Day 2 fear recall; fearfulness predicted initial fear        |
| Nikolić et al. (2018)     | 96 children                      | 8–12 years           | Typically developing children | N/A             | Singing on stage followed by inflated, noninflated, or no praise | PPG and TEMP sensor for blushing | Cheek                                                                         | 3 minutes  | Blood pulse amplitude, blood volume, temperature changes             | Comparative analysis of physiological and self-reported blushing | Inflated praise increased blushing in socially anxious children       |
| Davies et al. (2015)      | 60 participants (34 CBT, 26 ACT) | Mean age 35.76 years | Anxiety disorders             | MASQ, ADIS-IV   | Relaxation Task; Hyperventilation Task                           | ECG, respiration                 | ECG: under right clavicle, lower right rib, left clavicle; RSP: chest/abdomen | 15 hours   | HRV, HF                                                              | FFT using Kubios software                                        | Higher pre-treatment HRV associated with worse outcome                |
| Giannakakis et al. (2017) | 23 participants                  | N/R                  | Healthy                       | N/R             | Stroop Color Word Test, mental arithmetic tasks                  | ECG, rPPG (facial video)         | ECG: Chest; rPPG: Face (camera-based)                                         | N/R        | Eye-related events, mouth activity, head movements, HR, HRV features | ML classifiers, statistical analysis                             | Facial cues combined with rPPG-derived HR effectively detected stress |
| Jiao et al. (2023)        | 9 participants                   | N/R                  | Healthy workers               | N/R             | Hot and humid working environment                                | PPG, EEG                         | PPG: Fingertip; EEG: Scalp (5 channels); Pupil diameter                       | N/R        | PPG features, pupil diameter, EEG signals                            | Quick identification model for anxiety and thermal comfort       | PPG, pupil diameter, EEG together assessed workers' anxiety           |

#### **S4. Database Search Strategy**

A single Boolean search query was developed and applied identically across PubMed, Embase, and ScienceDirect for the period from January 2015 to July 2025. The query used was:

```
(anxiety) AND (detection OR recognition OR prediction) AND (ECG OR  
electrocardiogram OR PPG OR photoplethysmography)
```

In all three databases, the search targeted titles, abstracts, and author-supplied keywords. Filters applied were: English language, human studies, and methodology papers.

#### **Search strings as executed in each database:**

##### **1. PubMed:**

```
(anxiety) AND (detection OR recognition OR prediction) AND (ECG OR  
electrocardiogram OR PPG OR photoplethysmography)
```

Filters: English, Humans, Methodology; publication date January 2015-July 2025.

##### **2. Embase:**

```
(anxiety) AND (detection OR recognition OR prediction) AND (ECG OR  
electrocardiogram OR PPG OR photoplethysmography)
```

Filters: English language, Humans, Methodology; publication year January 2015-July 2025.

##### **3. ScienceDirect:**

```
(anxiety) AND (detection OR recognition OR prediction) AND (ECG OR  
electrocardiogram OR PPG OR photoplethysmography)
```

Filters: English language, Humans, Methodology; year range 2015-2025.

These search strings were designed to ensure a consistent and reproducible strategy across databases.
